# Supplementary material for: A tetraazaporphyrin with an intense, broad near-IR band
Source: Royal Society of Chemistry journal article supplement (doi:10.1039/b007515i), 2001-01-01
Supplement: b007515i.doc [file b007515i.doc]

Beer`s law experiments for **1**. Line is the theoretically predicted values, squares are experimental results.
