# Supplementary material for: A tetraazaporphyrin with an intense, broad near-IR band
Source: Royal Society of Chemistry journal article supplement (doi:10.1039/b007515i), 2001-01-01
Supplement: b007515ib.doc [file b007515ib.doc]

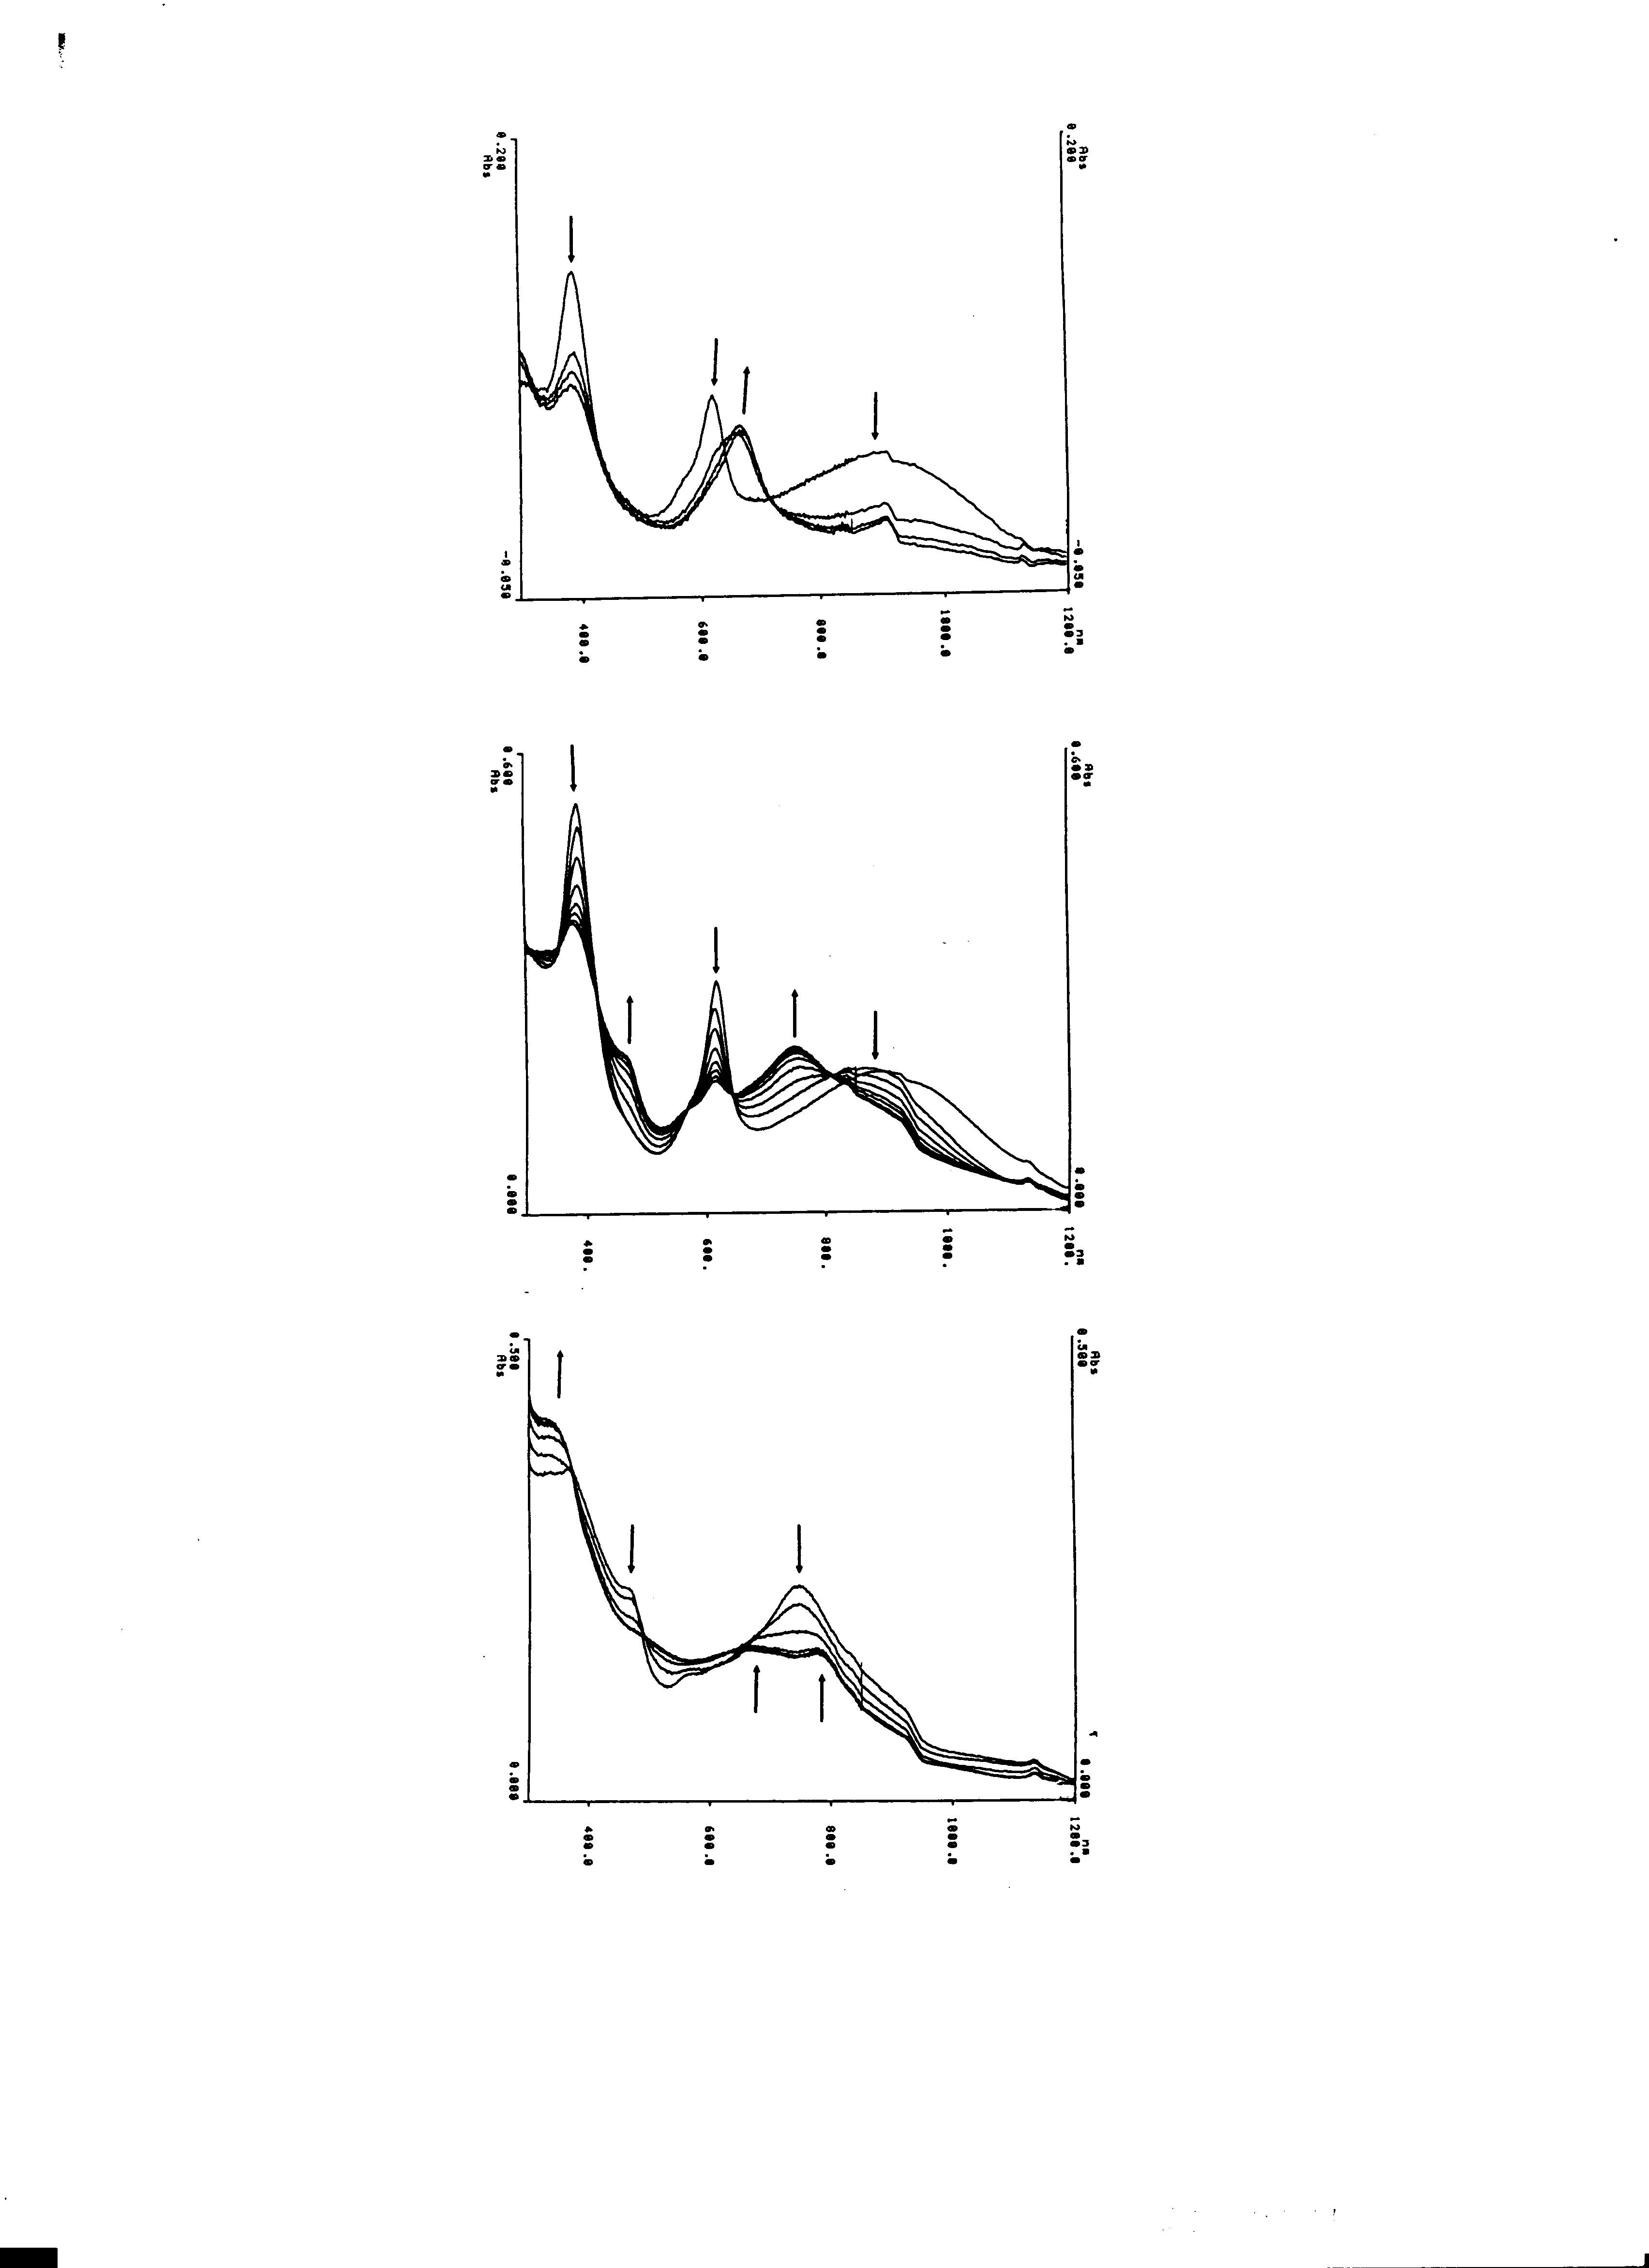
UV-VIS spectra recorded during the electrolysis of **1** at controlled potentials. Top spectrum – first oxidation (potential +0.7V). Middle spectrum – first reduction (potential –0.45V). Bottom spectrum – second reduction (potential –1.0V).
